# Supplementary material for: A six-year circum-Antarctic icebergs dataset (2018–2023)
Source: Copernicus journal article supplement (doi:10.5194/essd-18-147-2026), 2026-01-06
Supplement: Supplementary file 1 [file essd-18-147-2026-supplement.pdf]

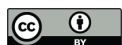

*Supplement of*

## **A six-year circum-Antarctic icebergs dataset (2018–2023)**

**Zilong Chen et al.**

*Correspondence to:* Teng Li (liteng28@mail.sysu.edu.cn) and Xiao Cheng (chengxiao9@mail.sysu.edu.cn)

The copyright of individual parts of the supplement might differ from the article licence.

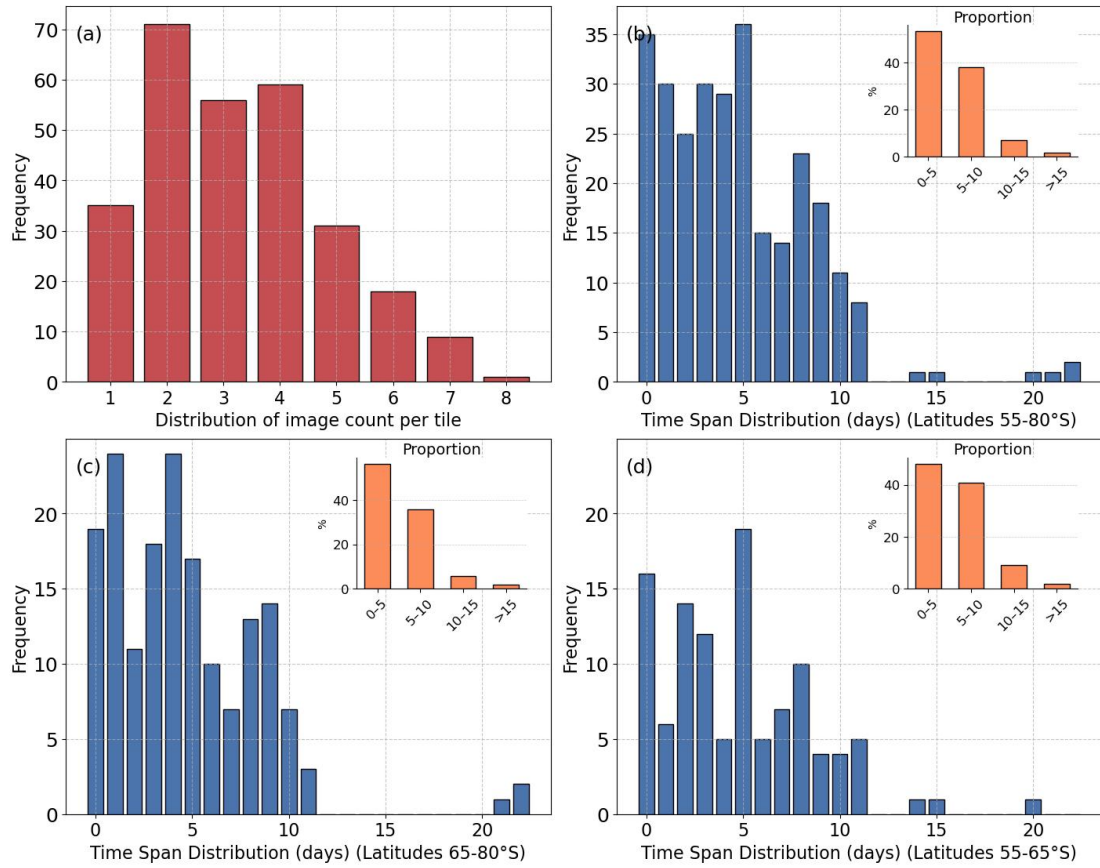

**Figure S1.** Panel (a) distribution of the number of Sentinel-1 images per tile. Panels (b-d) histograms of the time span between acquisition dates for tiles in different latitude bands (55°S-80°S, 55°S-65°S and 65°S-80°S).

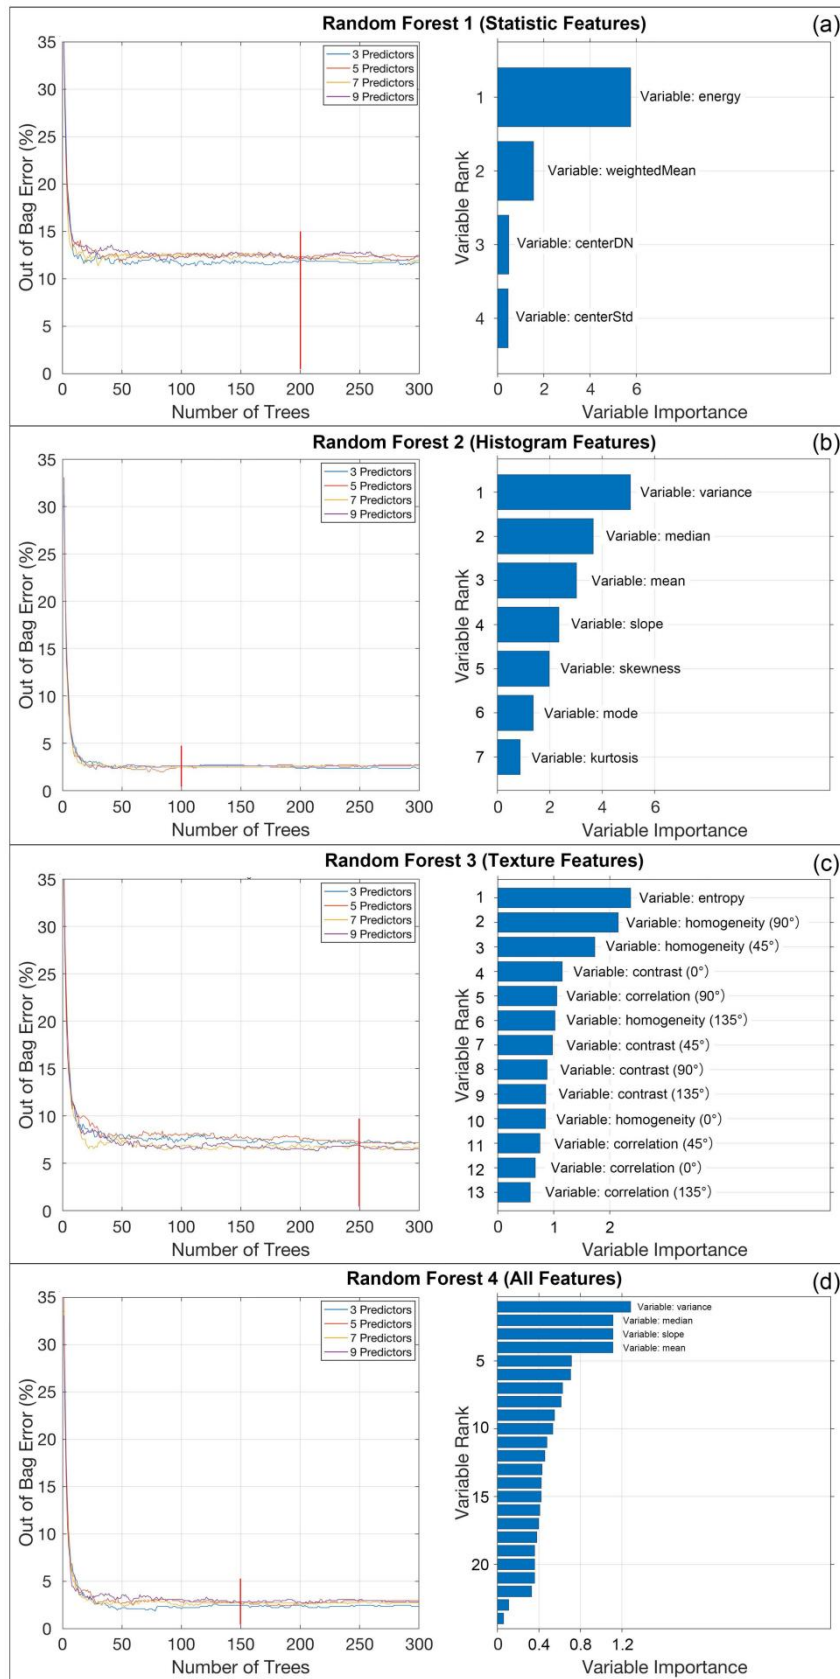

**Figure S2.** Out-of-bag error and parameter importance of random forest classifiers based on different feature sets.

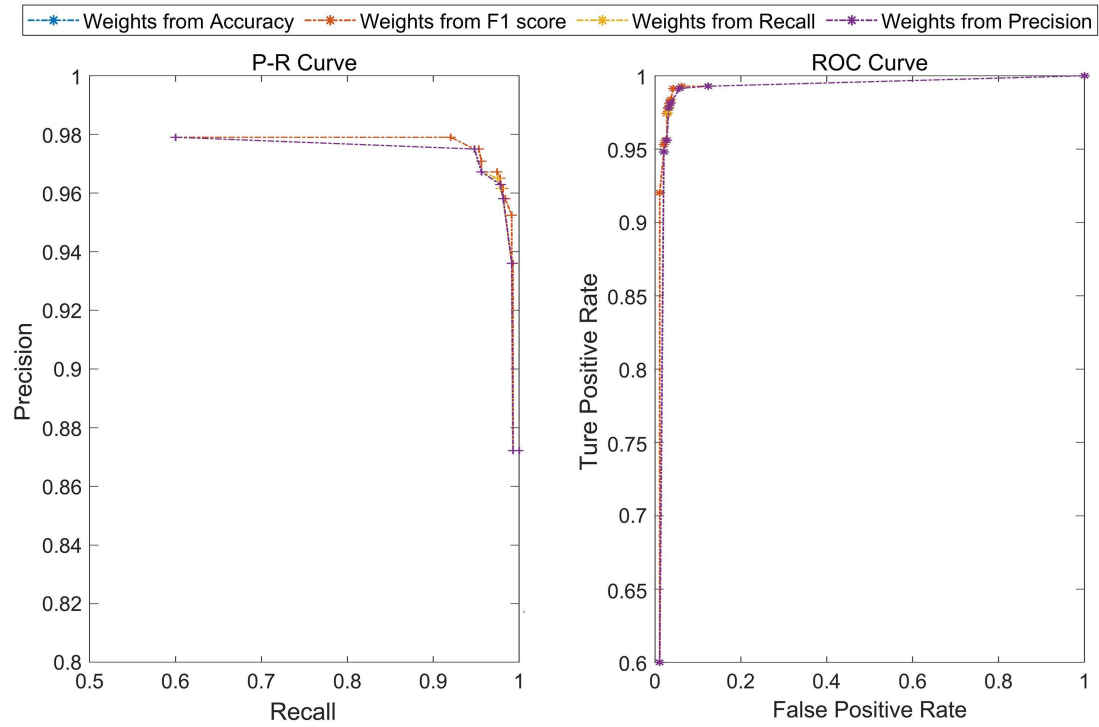

**Figure S3.** P-R and ROC curves of the incremental random forest classifiers.

**Table S1.** Optimal model parameters optimized independently for each year (2018-2023) for dataset production.

| Year | Number of trees<br>(RF1-RF4) | Weight (RF1-RF4)           | Threshold |
|------|------------------------------|----------------------------|-----------|
| 2018 | 200, 100, 250, 150           | 0.218, 0.271, 0.246, 0.265 | 0.783     |
| 2019 | 100, 100, 200, 100           | 0.230, 0.263, 0.244, 0.263 | 0.756     |
| 2020 | 300, 200, 200, 100           | 0.232, 0.259, 0.247, 0.262 | 0.739     |
| 2021 | 250, 200, 200, 200           | 0.210, 0.276, 0.238, 0.276 | 0.724     |
| 2022 | 250, 150, 100, 200           | 0.213, 0.274, 0.236, 0.277 | 0.726     |
| 2023 | 150, 150, 100, 200           | 0.214, 0.269, 0.247, 0.270 | 0.731     |

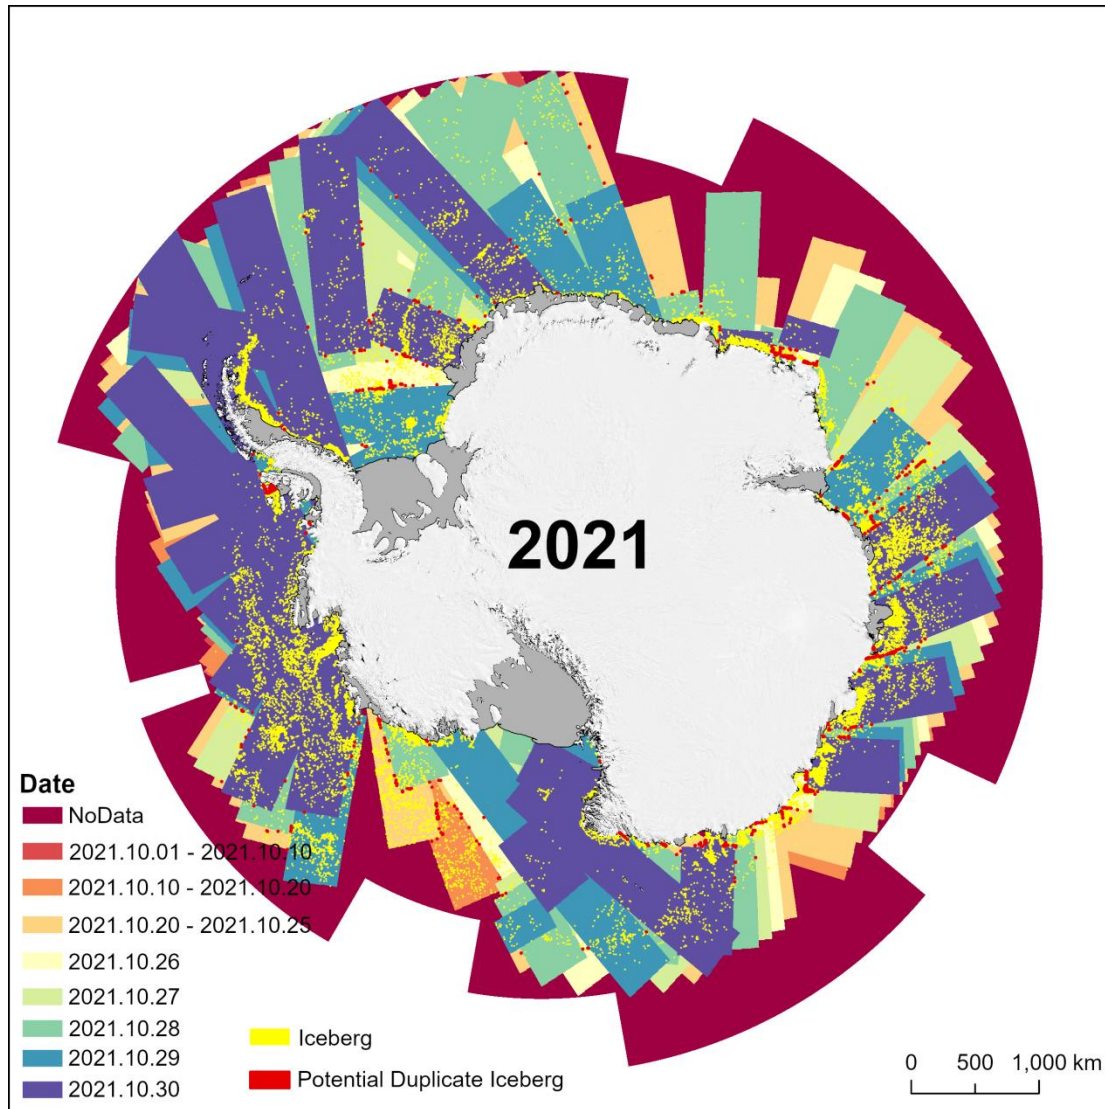

**Figure S4.** Spatial distribution of detected icebergs and potential duplicates around Antarctica in October 2021. Colors indicate the acquisition dates of Sentinel-1 EW scenes used to construct the monthly mosaic, while yellow and red points mark iceberg detections and potential duplicate icebergs, respectively.



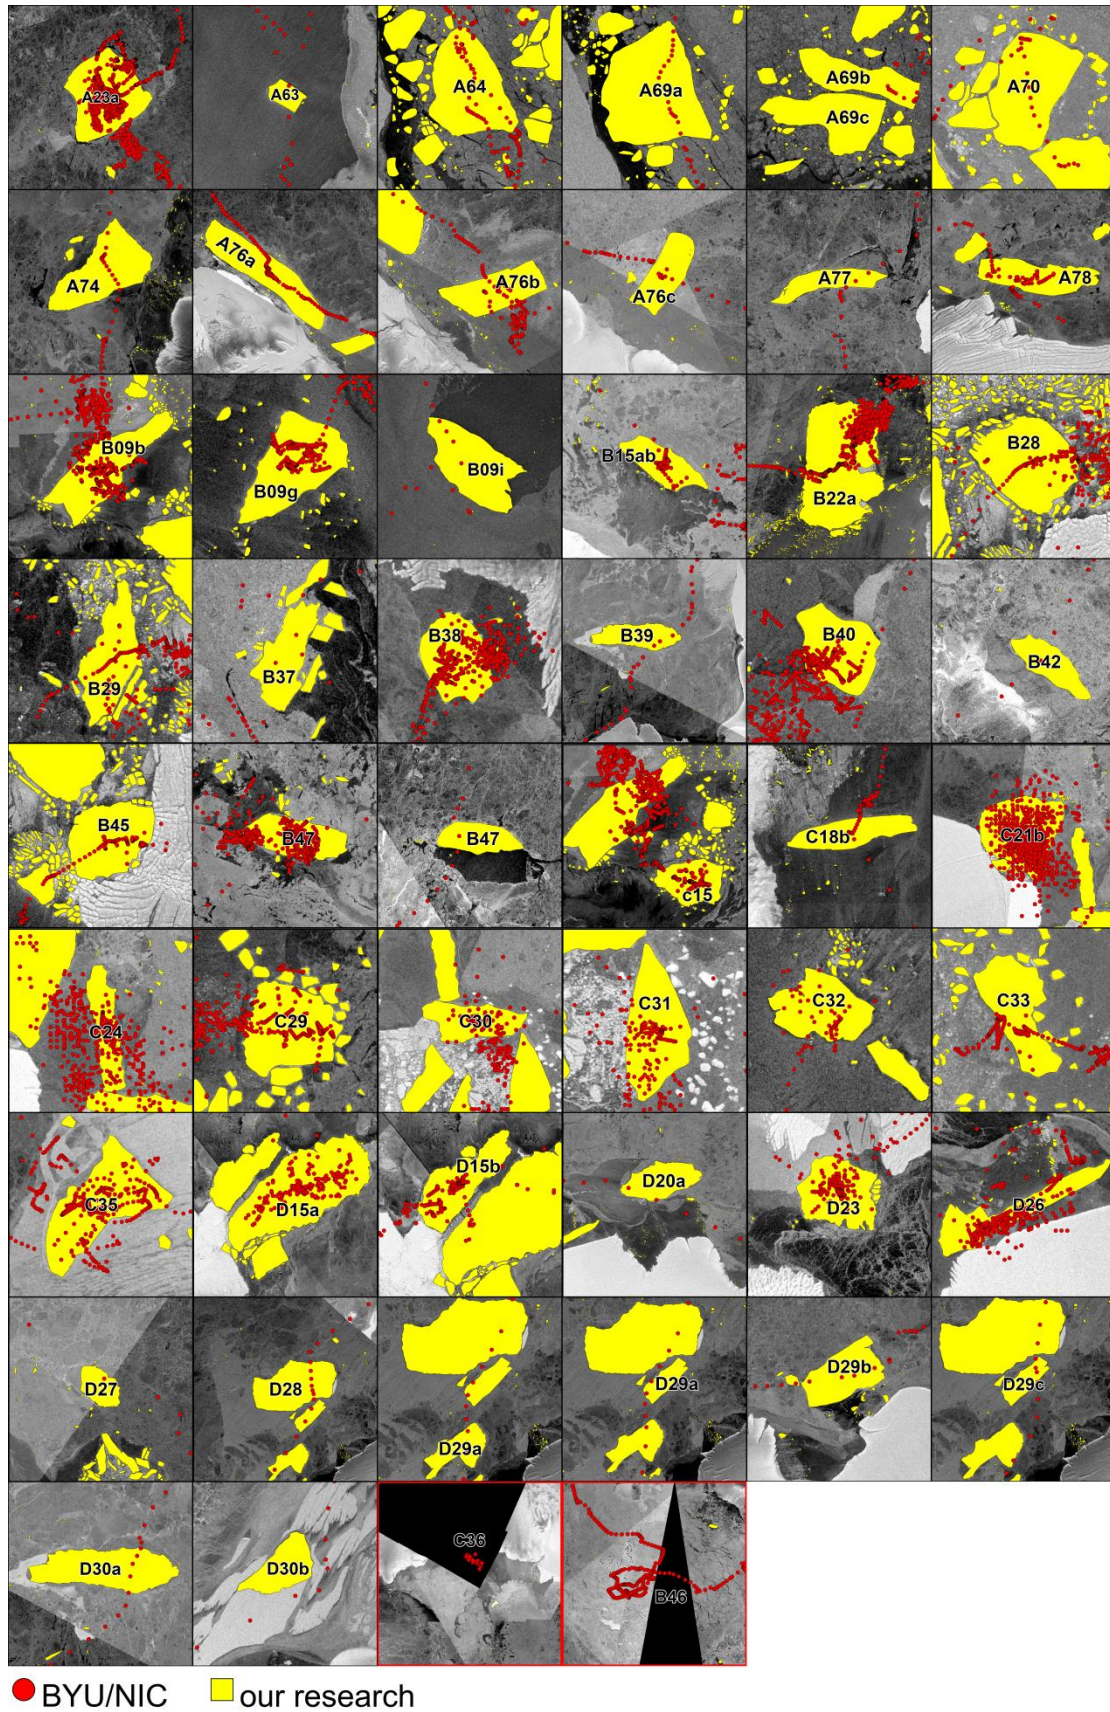

**Figure S5.** Comparison between iceberg trajectories recorded by



BYU/NIC in October 2021 and the spatial distribution from our database. Yellow polygons represent iceberg outlines identified in this study, while red dots mark iceberg positions reported by BYU/NIC, with labels corresponding to the official naming by the U.S. National Ice Center (NIC). Icebergs missed by our detection are highlighted with red frames.

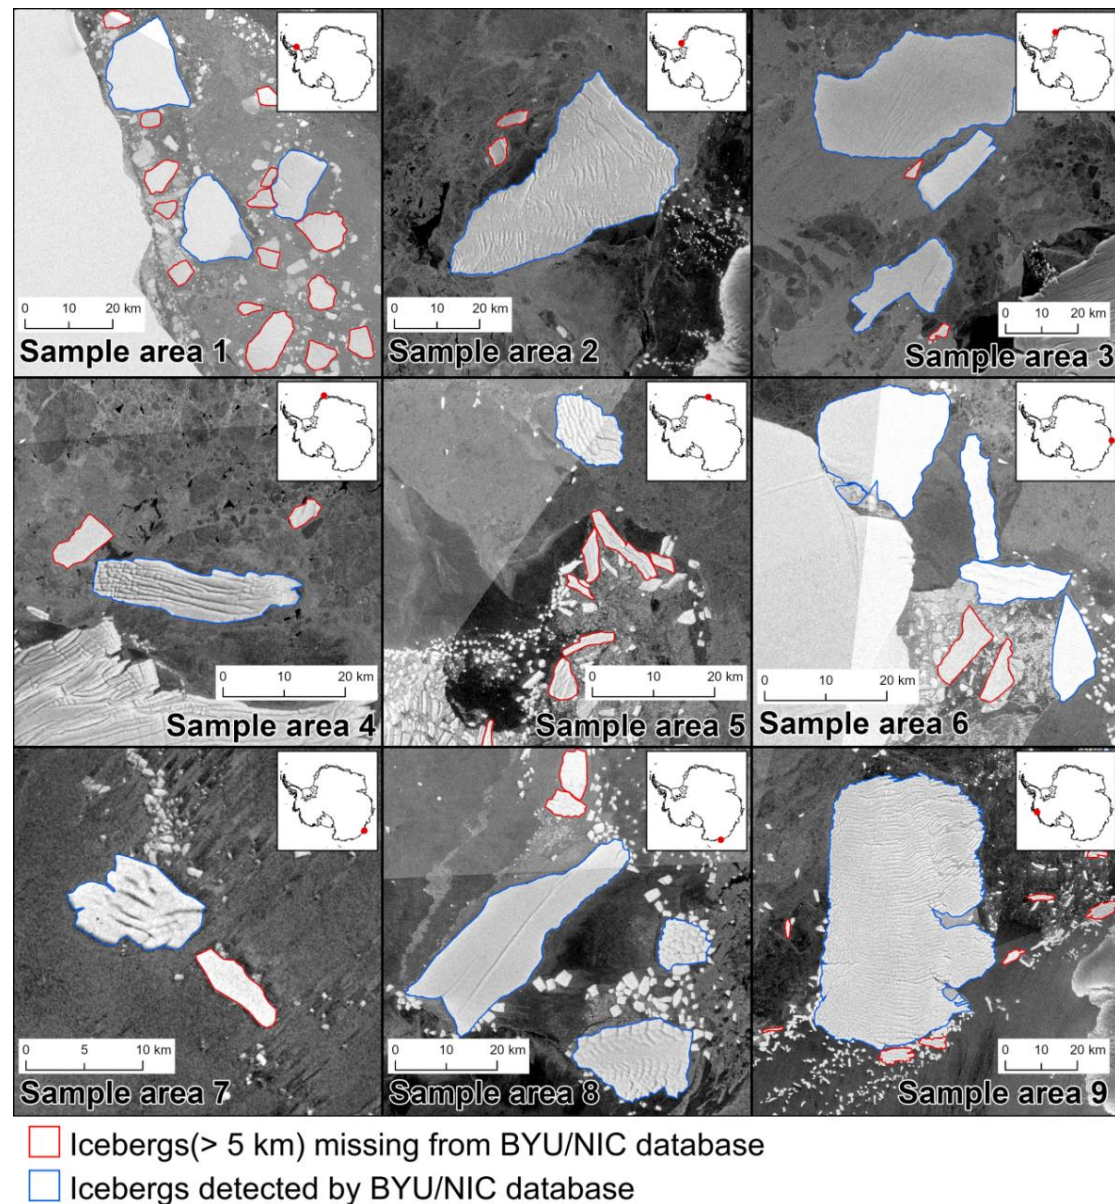

**Figure S6.** Examples of iceberg detections in nine representative sample areas. Blue outlines mark icebergs detected by the BYU/NIC database, while red outlines highlight icebergs with a major axis greater

than 5 km that are missing from the BYU/NIC database but identified in this study. Insets show the geographic location of each sample area around Antarctica.

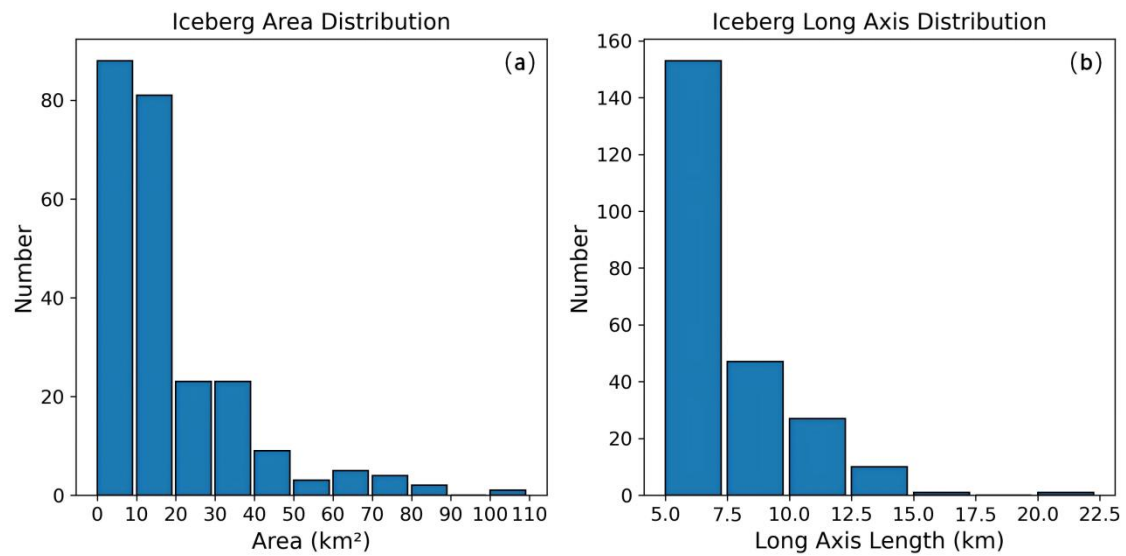

**Figure S7.** Histograms of geometric properties of icebergs missed by the BYU/NIC database: (a) iceberg area and (b) iceberg long-axis length.
